# Supplementary material for: Genome-wide binding analysis of the tomato transcription factor SlDof1 reveals its regulatory impacts on fruit ripening
Source: PubMed Central journal article supplement (PMC10514982; doi:10.1186/s43897-021-00011-y), 2021-08-28
Supplement: 43897_2021_11_MOESM2_ESM.pdf [file 43897_2021_11_MOESM2_ESM.pdf]

**Table S1. Primer sequences used for quantitative RT-PCR analysis.**

| <b>Gene</b>    | <b>ITAG gene ID<sup>a</sup></b> | <b>Primers</b> | <b>DNA sequences (5'-3')</b> |
|----------------|---------------------------------|----------------|------------------------------|
| <i>SIDof1</i>  | Solyc01g096120                  | Forward        | GGGATTACACTGGGTTGAGTATGTT    |
|                |                                 | Reverse        | GCTAGCACAGAAACCCTAGAAGCT     |
| <i>SIDof2</i>  | Solyc02g065290                  | Forward        | TTGCCACGCTGTGACTCTATC        |
|                |                                 | Reverse        | TGGCGTGGCTGAGACAAATTGTAG     |
| <i>SIDof3</i>  | Solyc02g067230                  | Forward        | CAGGAGAGGCTGCAAAGAGTTC       |
|                |                                 | Reverse        | ACTTCCACCAACTGAATCAACGG      |
| <i>SIDof4</i>  | Solyc02g076850                  | Forward        | TGGTGGCTCATGAAGATCAATGGC     |
|                |                                 | Reverse        | AGGTGCTTCTCCTCCTCTTAGCTG     |
| <i>SIDof5</i>  | Solyc02g077950                  | Forward        | CAGCAAATGAAGGATCCGAACAAC     |
|                |                                 | Reverse        | AGCTGACATGATCACTCCGATCC      |
| <i>SIDof6</i>  | Solyc02g077960                  | Forward        | AGGTGGAACCCTAAGGAACGTC       |
|                |                                 | Reverse        | CCGCCCTTCATTGTGCGTTTAC       |
| <i>SIDof7</i>  | Solyc02g078620                  | Forward        | CACAATACTCGACCGGAACCAC       |
|                |                                 | Reverse        | CACCTTGGACATTTCAACGACTCC     |
| <i>SIDof8</i>  | Solyc02g088070                  | Forward        | CACCACTATGAATGGAGCTTCACC     |
|                |                                 | Reverse        | AGAAGGCCAACAGGAAGAAAGGG      |
| <i>SIDof9</i>  | Solyc02g090220                  | Forward        | TGCGAAACGGTCCCGTACAATC       |
|                |                                 | Reverse        | AGAGAGCGTGGAGGACAAACAG       |
| <i>SIDof10</i> | Solyc02g090310                  | Forward        | TTTGGATTTCGGCTCCGGTAACTG     |
|                |                                 | Reverse        | TGTTGAAAGGGTCGGGTTCCAG       |
| <i>SIDof11</i> | Solyc03g082840                  | Forward        | ACAGATCTGGCGAACCCCTAACG      |
|                |                                 | Reverse        | AGTACCACCACTGGGTATTGGG       |
| <i>SIDof12</i> | Solyc03g112930                  | Forward        | CATGACGATCAATTAGGCAGCAAC     |
|                |                                 | Reverse        | AGATCCTAGGCCACCATTACCAG      |
| <i>SIDof13</i> | Solyc03g115940                  | Forward        | CATACGCTGCTGTTTCCTTTCCC      |
|                |                                 | Reverse        | ATAAGGAGGAGGGCAGAATGGC       |
| <i>SIDof14</i> | Solyc03g121400                  | Forward        | CCCTGCAACTCCTCCATTAACATC     |
|                |                                 | Reverse        | TGCAGGTATAACCGAATGGCTCTG     |

---

|                |                |         |                               |
|----------------|----------------|---------|-------------------------------|
| <i>SIDof15</i> | Solyc04g070960 | Forward | TTGGCTATGCAGTCGGTTGGAC        |
|                |                | Reverse | TGCACTCTTTGGCACTCGTTTG        |
| <i>SIDof16</i> | Solyc04g079570 | Forward | TGGGTGGGTTTGTGCCATTAGG        |
|                |                | Reverse | TGGGCCAATCAAGATTCCCAAGC       |
| <i>SIDof17</i> | Solyc05g007880 | Forward | CCTCGTTACTTCTGCAAGAACTGC      |
|                |                | Reverse | ACCAGATCCCACAGGCACATTTT       |
| <i>SIDof18</i> | Solyc05g054510 | Forward | CCCAATTGGCATCATGAGCAAGG       |
|                |                | Reverse | CTAGTTGAGCCAAGTGGACCAC        |
| <i>SIDof19</i> | Solyc06g005130 | Forward | TCTCGTGCTGGCTTTCTTGATAC       |
|                |                | Reverse | TGGTGCAAGAAGCCATTTGATGC       |
| <i>SIDof20</i> | Solyc06g062520 | Forward | TTCCAGTTGGTGGGAAGCTCTCG       |
|                |                | Reverse | TCGTCATCGTTGAGGAGCGTTTAC      |
| <i>SIDof22</i> | Solyc06g069760 | Forward | ACTCCAGCGGGAAACTTCATGG        |
|                |                | Reverse | GCTCTGTAAGTGATCTGCGCACTG      |
| <i>SIDof23</i> | Solyc06g071480 | Forward | TGGTACTACTGGTCTGATCAACGG      |
|                |                | Reverse | AGCAATAATGTGGTCCGATTCTCG      |
| <i>SIDof24</i> | Solyc06g075370 | Forward | TCCCTCTAGTGCACAGCATCAG        |
|                |                | Reverse | TGGCTTTGTACTCACCAACATGC       |
| <i>SIDof27</i> | Solyc08g082910 | Forward | TGCTAACAGCCCAACTTTCTC         |
|                |                | Reverse | ACACATGACATGGTAGACCCAAAC      |
| <i>SIDof28</i> | Solyc09g010680 | Forward | ACCTTGGTGGTGGAGAGTACGAG       |
|                |                | Reverse | TCACGGAGGCCATTTGATTTAGC       |
| <i>SIDof29</i> | Solyc10g009360 | Forward | CATGGTGAATAAGGAATTGAAAGAAA    |
|                |                | Reverse | TCAAAGAGTAAAGTGAATAACAAGGAACT |
| <i>SIDof30</i> | Solyc10g086440 | Forward | TGTGGGTGGTGGAGGTTCAATC        |
|                |                | Reverse | TTTGCTAACCGGGCTCGATCTG        |
| <i>SIDof32</i> | Solyc11g066050 | Forward | CCAACCGCGCCATTTCTGTAAG        |
|                |                | Reverse | TCCCACCGGCACATTTCTCAAG        |
| <i>SIDof33</i> | Solyc11g072500 | Forward | TCAGCAAAGCGATCAAGCCAAG        |
|                |                | Reverse | TGGCGAATGCTAGGCTCAAATCAG      |

---

---

|              |                |         |                            |
|--------------|----------------|---------|----------------------------|
| <i>NOR</i>   | Solyc10g006880 | Forward | AGAGAACGATGCATGGAGGTTTGT   |
|              |                | Reverse | ACTGGCTCAGGAAATTGGCAATGG   |
| <i>FUL1</i>  | Solyc11g005330 | Forward | GTTTTGCCACAACAACCTGGACTC   |
|              |                | Reverse | CTTGCTGCTGTGAAGAACTACC     |
| <i>ACS2</i>  | Solyc01g095080 | Forward | AATGTCAAGAGCCAGGGTGGTTCC   |
|              |                | Reverse | TCCTCGCGAGCGCAATATCAAC     |
| <i>Nr</i>    | Solyc09g075440 | Forward | TGTTCCCTATGCCAAGTGATGGC    |
|              |                | Reverse | ACACCCAGTATCTCTAACCTGGAC   |
| <i>PSY1</i>  | Solyc03g044300 | Forward | ATCAATAGAGGTGGTGGAAAGCAA   |
|              |                | Reverse | CCAGATGGAGTAGCCAAAATAGCA   |
| <i>PDS</i>   | Solyc03g123760 | Forward | TTGACAGAAAACCTGAAGAACACATA |
|              |                | Reverse | TGCAAAAACCAATTCCAACATAGAC  |
| <i>PG2A</i>  | Solyc10g080210 | Forward | TGGACAAGTATGGTGGCCAAGTTC   |
|              |                | Reverse | TCCAGAAGGTTAAGGCCGTTGG     |
| <i>PME1</i>  | Solyc07g064170 | Forward | TCCCGCTAAAGCTATGCCGTTTC    |
|              |                | Reverse | TTATGCTTGCTCTGCCCTGCTC     |
| <i>LoxC</i>  | Solyc01g006540 | Forward | CGGTGGTGCCGGCATTGGAA       |
|              |                | Reverse | CGGTGGTGCCGGCATTGGAA       |
| <i>ADH2</i>  | Solyc06g059740 | Forward | ACACCGTGGTTCATGTTGGATGTG   |
|              |                | Reverse | TCAAACCTGCTCCAAGGCCTGTC    |
| <i>ACTIN</i> | Solyc11g005330 | Forward | TGTCCCTATTTACGAGGGTTATGC   |
|              |                | Reverse | AGTTAAATCACGACCAGCAAGAT    |

---

<sup>a</sup>ITAG, the International Tomato Annotation Group release version 2.5.

**Table S2. Primer sequences used for ChIP-qPCR analysis.**

| Gene           | ITAG gene ID <sup>a</sup> | Position | Primers | DNA sequences (5'-3')      |
|----------------|---------------------------|----------|---------|----------------------------|
| <i>ACS2</i>    | Solyc01g095080            | -869 ~   | Forward | TTGTAATGGCAGTCTCTTTTTTCTC  |
|                |                           | -718     | Reverse | CCGGGTTTTCACTTCATCAC       |
| <i>NR</i>      | Solyc09g075440            | -270 ~   | Forward | GCCTGTAAGTAACCATACCTCTTAA  |
|                |                           | -118     | Reverse | GGCATGTAGCATTTCATCCAA      |
| <i>PG2A</i>    | Solyc10g080210            | -1023 ~  | Forward | GAATCGAAGCACCAATCTAATTT    |
|                |                           | -848     | Reverse | ATTCCTTCGTCTCAATTATGTGATG  |
| <i>NOR</i>     | Solyc10g006880            | -1533 ~  | Forward | CATATGAGCGCCACGAATTC       |
|                |                           | -1383    | Reverse | ACGCATGCAAGTTGGTACCA       |
| <i>MC</i>      | Solyc05g056620            | -1882 ~  | Forward | GCGCCCTTTGTTATTACTTTTCCT   |
|                |                           | -1707    | Reverse | GCGCCACACATTTTAGTATTCCTTA  |
| <i>SIIAA2</i>  | Solyc06g084070            | -1416 ~  | Forward | AAAAGCTAAGCGATTTAACAAGTG   |
|                |                           | -1215    | Reverse | TATTGCAGTGGACTGACTAAAGC    |
| <i>SIIAA4</i>  | Solyc06g053840            | -620 ~   | Forward | GCCCCACCCCTAAATAGTAGT      |
|                |                           | -382     | Reverse | CCCCAAAACCTACAAATCACAA     |
| <i>SIIAA27</i> | Solyc03g120500            | -1218 ~  | Forward | CCTATTTGATGGTTGGCACTAA     |
|                |                           | -963     | Reverse | CGTTGCACTGAGTTTGTCTAATAC   |
| <i>SIREV8</i>  | Solyc10g084370            | -321 ~   | Forward | TAGAGCATGTGCATCTACGTATTC   |
|                |                           | -121     | Reverse | CAAGTGGTCTACGCCGATTT       |
| <i>SIDIV2</i>  | Solyc06g076770            | -328 ~   | Forward | GTCATAAAGGGAAAAAAGGAAGAA   |
|                |                           | -128     | Reverse | TCCACTGTTTTAGTCCTTCAAAT    |
| <i>PSY1</i>    | Solyc03g031860            | -1660 ~  | Forward | GCTAAATCGAAAATTGAATCGTT    |
|                |                           | -1407    | Reverse | TTCCACTGTTTTAGTCCTTCAAAT   |
| <i>ADH2</i>    | Solyc06g059740            | -1597 ~  | Forward | CTTCAAGACTCTAATTTTTTTTA    |
|                |                           | -1386    | Reverse | AAAAAGTAGTTATCAATATTAGGAA  |
| <i>SIDof1</i>  | Solyc01g096120            | -1491~   | Forward | AGTAAAGTGAAACACTGAAAAGTCTA |
|                |                           | -1362    | Reverse | TGTAACATGTTCTAATTGTCCTCTAT |
| <i>ACS2</i>    | Solyc01g095080            | -1707~   | Forward | TCACAAACGAGCTATTCTAAAAA    |
|                |                           | -1605    | Reverse | CCTTACATCATTTATTATTACAA    |

<sup>a</sup>ITAG, the International Tomato Annotation Group release version 2.5.

**Table S3. Primer sequences of promoters in transcriptional activity assay.**

| <b>Gene</b>    | <b>ITAG gene ID<sup>a</sup></b> | <b>Primers</b> | <b>DNA sequences (5'-3')</b>         |
|----------------|---------------------------------|----------------|--------------------------------------|
| <i>ACS2</i>    | Solyc01g095080                  | Forward        | GCCCATGATAAGCCTCCAT                  |
|                |                                 | Reverse        | TTTTTTTTTACTAAATGAGTTTAGAAGTGAAGAAAT |
| <i>PG2A</i>    | Solyc10g080210                  | Forward        | TTTGGGGCCTAAGACAAAGG                 |
|                |                                 | Reverse        | GATATATTGTTATATGGTATGGTTTTTAAACTTGT  |
| <i>SIIAA2</i>  | Solyc06g084070                  | Forward        | TTATTGTTTGGTTGTGGGCG                 |
|                |                                 | Reverse        | TTCTTATAATTTACGGTGAAAGCTGAA          |
| <i>SIIAA4</i>  | Solyc06g053840                  | Forward        | AATGTTTGCTATATGTGAAAGTTGCC           |
|                |                                 | Reverse        | TATAGAGGGTCCACCCGTT                  |
| <i>SIIAA27</i> | Solyc03g120500                  | Forward        | ACATATAAAAAGAGATGGATGATGTTGGT        |
|                |                                 | Reverse        | AGACTTCTTTTGGTGCTTTTGTAGA            |

<sup>a</sup>ITAG, the International Tomato Annotation Group release version 2.5.
